# Supplementary material
Source: PubMed Central journal article supplement (PMC2562073)
Supplement: M805711200_1.pdf [file M805711200_1.pdf]

Fig.S1.

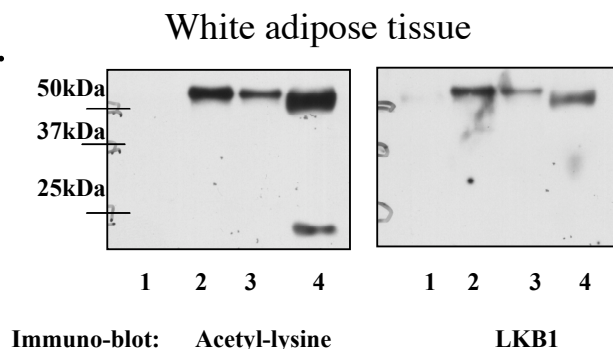

**Lysine acetylation of endogenous LKB1.** In white adipose tissue from the mouse, LKB1 was immunoprecipitated with covalently linked anti-LKB1 antibody-protein G beads. Lane 1: beads only, 2: 200  $\mu$ g lysate, 3: 100  $\mu$ g lysate, 4: IgG.

Fig.S2A.    Acetylated lysines (K\*) identified by MALDI-TOF and LC-MS/MS

| Acetylated lysine | MALDI-TOF |                                       | LC-MS/MS            |
|-------------------|-----------|---------------------------------------|---------------------|
|                   | M/z       | Mass matched sequence                 | Acetylated fragment |
| K44, K48          | 2197.1579 | (R)AK* <b>LIGK*</b> YLMGDLLGEGSYGK(V) | RAK* <b>LKGK*</b>   |
| K96, 97           | 983.5162  | (R)IPNGEANVK*(K)                      | KLRRIPNGEANVK*      |
|                   | 1267.7123 | (R)RIPNGEANVK*K(E)                    | LRRIPNGEANVK*K*     |
| K296              | 1235.6094 | (K)GMLEYEPAK*R(F)                     |                     |
| K310              | 1427.766  | (R)QIRQHSWFRK*(K)                     |                     |
| K416,423          | 1542.7698 | (R)APNPARK*ACSASSK*(I)                | APNPARK*ACSASSK*    |
| K431              | 1045.5941 | (K)IRRLSACK*(Q)                       | RLSACK*             |

Fig.S2B.

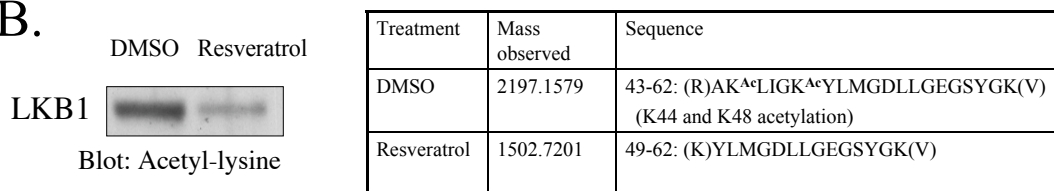

**Deacetylation of LKB1-K48 by resveratrol.** (Left Panel) Resveratrol (50  $\mu$ M for 60 minutes), a putative SirT1 activator, decreased total LKB1 acetylation. (Right Panel). A mass spec analysis (MALDI-TOF) was carried out in which trypsin was used to cleave LKB1 enzymatically. Unacetylated lysines are susceptible to cleavage by trypsin; however acetylated lysines are resistant. In keeping with this, the mass signature corresponding to amino acids (aa) 43-62, containing AcK44 and AcK48, was only observed under baseline (DMSO) condition. Treatment with resveratrol caused the disappearance of the aforementioned fragment and the mass appearance of aa 49-62 without any acetylation, suggesting that stimulation with resveratrol leads to deacetylation of AcK48.

Fig.S3.

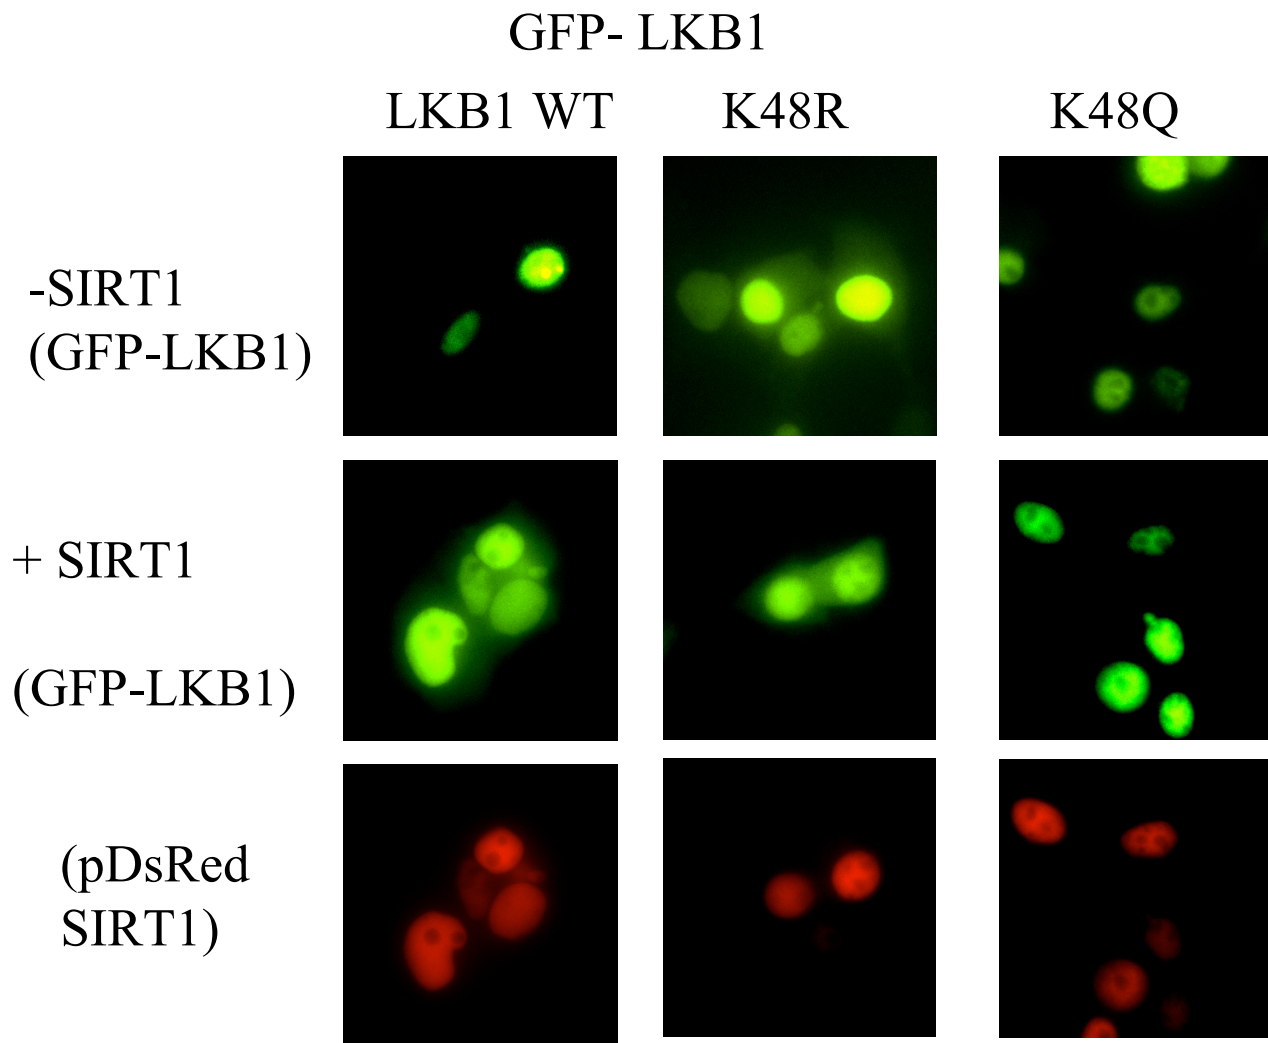

GFP-tagged (green) LKB1 WT, K48R and K48Q mutant was transfected with/ without pDsRed-tagged SIRT1 (red). SIRT1 expression increases LKB1 cytoplasmic localization and mutation of K48 to R mimicked the effect. The differences are most recognizable on the screen in the Windows computer.

Fig.S4.

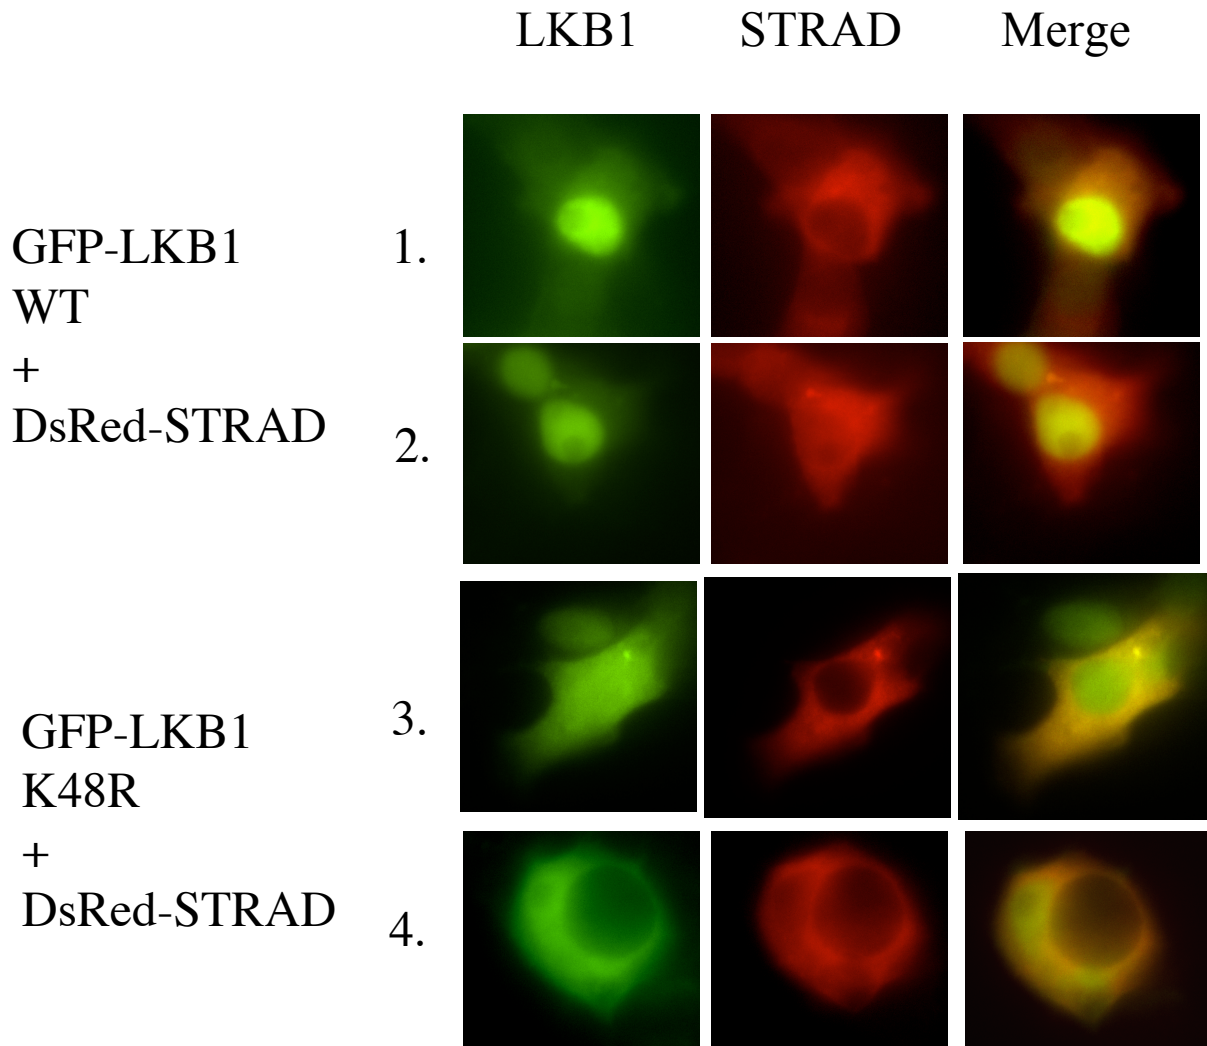

Plasmids (0.5  $\mu$ g) expressing GFP-tagged (green) LKB1 WT or the K48Rmutant were co-transfected with 0.2  $\mu$ g of pDsRed-tagged STRAD (red) into HEK293T cells grown in 6-well plates. The cells were fixed 12 hrs later. STRAD was predominantly localized in cytoplasm in all cells. STRAD co-expression enhanced the cytoplasmic localization of both WT and K48R (see Fig. S3) LKB1, with its effect greater in the latter. Thus, after transfection with STRAD, WT-LKB1 was still predominantly localized in the nucleus (1, 2), whereas K48R-LKB1 was either equally distributed between the cytoplasm and nucleus (3) or predominantly in the cytoplasm (4).
